# Supplementary material for: Facilely Flexible Imprinted Hemispherical Cavity Array for Effective Plasmonic Coupling as SERS Substrate
Source: MDPI journal article supplement (doi:10.3390/nano11123196), 2021-11-25
Supplement: s1 [file s1]

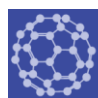

# Facilely Flexible Imprinted Hemispherical Cavity Array for Effective Plasmonic Coupling as SERS Substrate

Jihua Xu <sup>1</sup>, Jinmeng Li <sup>1</sup>, Guangxu Guo<sup>1</sup>, Xiaofei Zhao<sup>1</sup>, Zhen Li<sup>1</sup>, Shicai Xu<sup>2</sup>, Chonghui Li<sup>2</sup>, Baoyuan Man<sup>1</sup>, Jing Yu<sup>1,\*</sup> and Chao Zhang <sup>1,\*</sup>

<sup>1</sup> Collaborative Innovation Center of Light Manipulations and Applications, Institute of Materials and Clean Energy, School of Physics and Electronics, Shandong Normal University, Jinan 250358, China; xujihua23@163.com (J.X.); jinmeng345@163.com (J.L.); czsdnu@hotmail.com (G.G.); zxfsdnu@126.com (X.Z.); lizhen19910528@163.com (Z.L.); manyuanman\_sdn@163.com (B.M.)

<sup>2</sup> Shandong Key Laboratory of Biophysics, Institute of Biophysics, Dezhou University, Dezhou 253023, China; shicaixu@dzu.edu.cn (S.X.); chonghuili163@163.com (C.L.)

\* Correspondence: yujing1608@126.com (J.Y.); czsdnu@126.com (C.Z.)

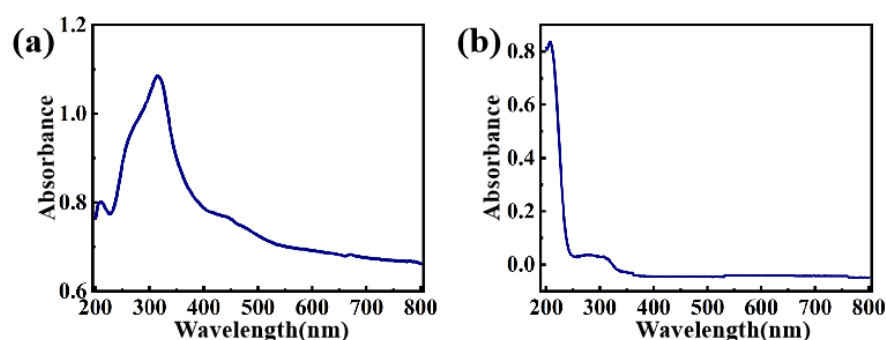

**Figure S1.** UV-vis spectra of Ag NPs/PVA nanocavity (a) and PVA film (b) in a wavelength range between 200 nm and 800 nm.

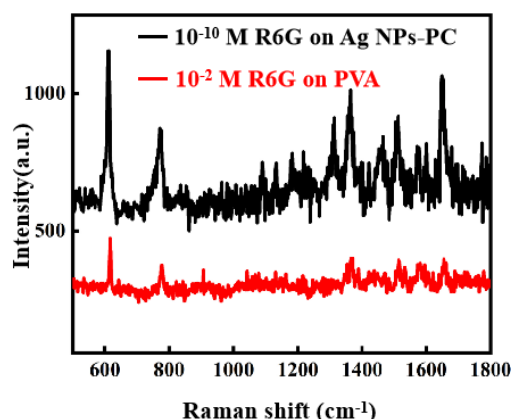

**Figure S2.** The Raman spectra of  $10^{-10}$  M R6G molecules were detected on Ag NP-on PC and  $10^{-2}$  M R6G molecules on PVA.
